# Supplementary material for: Adsorption of carbamazepine on self-endowed magnetic biochar produced from iron-rich sludge
Source: Royal Society of Chemistry journal article supplement (doi:10.1039/d5ra03580e), 2025-01-01
Supplement: d5ra03580e1.pdf [file d5ra03580e1.pdf]

# Supporting Materials

## **Adsorption of carbamazepine on self-endowed magnetic biochar produced from iron-rich sludge**

*Yan Liu<sup>a</sup>, Qianqian Li<sup>c</sup>, Honghui Pan<sup>a</sup>, Liying Liang<sup>a\*</sup>, Liyang Zhao<sup>a,b\*</sup>, Qin Shi<sup>a</sup>, Chuanqi Zhao<sup>a</sup>, Xixiang Liu<sup>a\*</sup>*

*a Guangxi Colleges and Universities Key Laboratory of Environmental-friendly Materials and New Technology for Carbon Neutralization, Guangxi Key Laboratory of Advanced Structural Materials and Carbon Neutralization, School of Materials*

*and Environment, Guangxi Minzu University, Nanning 530006, China*

*b College of New Energy and Environment, Jilin University, 130021, Changchun, China*

*c Huahong Water Group Co. Ltd., Nanning 530000, China.*

---

\*E-

mail:[20210011@gxmzu.edu.cn](mailto:20210011@gxmzu.edu.cn),[240946929@qq.com](mailto:240946929@qq.com),[liuwx200208@163.com](mailto:liuwx200208@163.com).

Supporting information includes a total of 7 tables, 1 text and 1 figure.

Table S1. Metal oxide content of iron-containing sludge

| Sample           | Fe <sub>2</sub> O <sub>3</sub> | SiO <sub>2</sub> | Al <sub>2</sub> O <sub>3</sub> | P <sub>2</sub> O <sub>5</sub> | CaO  | K <sub>2</sub> O | MgO  | Na <sub>2</sub> O |
|------------------|--------------------------------|------------------|--------------------------------|-------------------------------|------|------------------|------|-------------------|
| iron-rich sludge | 35.6%                          | 23.8%            | 9.5%                           | 16.4%                         | 5.4% | 1.2%             | 1.4% | 1.2%              |
| sludge           |                                |                  |                                |                               |      |                  |      |                   |
| Sludge           | 6.3%                           | 49.8%            | 24.4%                          | 8.9%                          | 3.0% | 2.4%             | 1.2% | 0.3%              |

Table S2. The heavy metal level of the iron-rich sludge

| Element        | Mn     | Zn     | Cr    | Cu    | Pb   |
|----------------|--------|--------|-------|-------|------|
| Amount (mg/kg) | 4681.3 | 3731.3 | 193.8 | 131.2 | 82.3 |

## Text S1. Characterization

In this study, the surface morphology of biochar was observed by scanning electron microscopy (SEM, SU 8010 Hitachi, JPN). The specific surface area, mean pore diameter and pore volume of the samples were measured by BET, ASAP 2ED-2300T460 Micromeritics, USA. Organic element analyzer (EA, Vario EL cube Elementar, GER) was used to measure the content of C, H, O, N, S in biochar. The distribution of elements and valence states on the surface of biochar was characterized by X-ray photoelectron spectroscopy (XPS, Thermo Fisher Scientific K-Alpha, USA). The types of functional groups and surface chemical structures of biochar were detected by Fourier infrared spectroscopy (FTIR, IRAffinia-1S Shimadzu, JPN). The surface charge properties of biochar were measured by Zeta potential analyzer (ZP, Zetasizer NANO ZS 90 Malvern). A vibrating sample magnetometer (VSM, Lake Shore 7410, USA) was used to detect the magnetic properties of the samples.

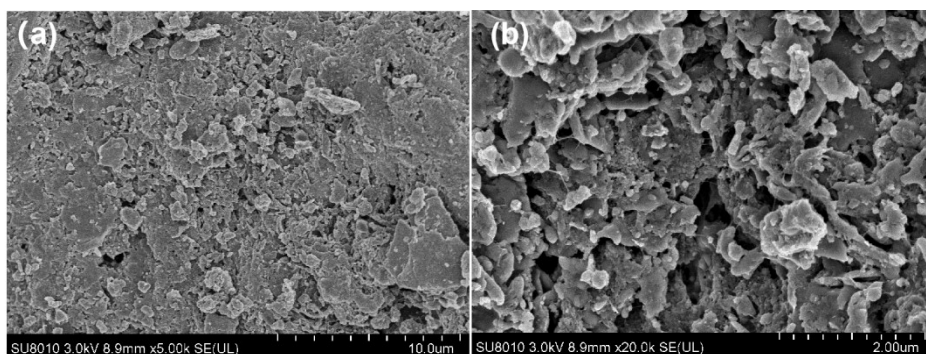

Figure S1. SEM images of CBZ adsorbed by PFBC (a, b)

Table S3 XPS spectrum analysis of FBC samples

| Binding energy<br>(eV) | Characteristic<br>peak | %                  |                    |                    |                    |
|------------------------|------------------------|--------------------|--------------------|--------------------|--------------------|
|                        |                        | FBC <sub>300</sub> | FBC <sub>500</sub> | FBC <sub>700</sub> | FBC <sub>900</sub> |
| 284.8                  | C-C/C=C                | 60.5               | 66.6               | 66.7               | 57.8               |
| 286.2                  | C-O                    | 24.7               | 22.2               | 22.7               | 36.7               |
| 288.6                  | C=O                    | 14.8               | 11.2               | 10.6               | 5.5                |
| 711.1/724.2            | Fe(II)                 | 41.1               | 42.7               | 49.4               | 62.8               |
| 713.4/726.2            | Fe(III)                | 58.9               | 57.3               | 50.6               | 37.2               |

Table S4. Fitting parameters of adsorption kinetics

| Experimental<br>adsorption<br>capacity(mg·g <sup>-1</sup> ) | Pseudo-first-order |                |                | Pseudo-second-order |                |                |
|-------------------------------------------------------------|--------------------|----------------|----------------|---------------------|----------------|----------------|
|                                                             | q <sub>e</sub>     | K <sub>1</sub> | R <sup>2</sup> | q <sub>e</sub>      | K <sub>1</sub> | R <sup>2</sup> |
| 4.79                                                        | 2.62               | 0.014          | 0.402          | 4.76                | 0.235          | 0.999          |

Table S5. Fitting parameters of adsorption isotherm

| Experimental | Langmuir isotherm | Freundlich isotherm |
|--------------|-------------------|---------------------|
|--------------|-------------------|---------------------|

| adsorption<br>capacity<br>$q_{\max} (\text{mg} \cdot \text{g}^{-1})$ | $q_{\max} (\text{mg} \cdot \text{g}^{-1})$ | $K_L$ | $R^2$ | $K_F$ | $1/n$ | $R^2$ |
|----------------------------------------------------------------------|--------------------------------------------|-------|-------|-------|-------|-------|
| 18.23                                                                | 18.83                                      | 0.142 | 0.962 | 6.189 | 0.258 | 0.919 |

Table S6. Leaching characteristics of organic matter and heavy metals

| Element<br>(mg/L)     | Cu    | Zn    | Cd    | Cr    | Pb    | TOC<br>(mg/L) |
|-----------------------|-------|-------|-------|-------|-------|---------------|
| Dissolution<br>amount | 0.000 | 0.020 | 0.000 | 0.000 | 0.000 | 0.735         |

Table S7. Specific surface area and pore structure parameters of CBZ adsorbed by PFBC

| Sample                  | Specific surface<br>area( $\text{m}^2/\text{g}$ ) | Pore volume<br>( $\text{cm}^3/\text{g}$ ) | Pore size<br>(nm) |
|-------------------------|---------------------------------------------------|-------------------------------------------|-------------------|
| FBC <sub>900</sub> -CBZ | 29.55                                             | 0.08                                      | 11.70             |
